# Supplementary material for: Mechanisms of Biased β-Arrestin-Mediated Signaling Downstream from the Cannabinoid 1 Receptor
Source: PubMed Central journal article supplement — Mol Pharmacol. 2016 Jun;89(6):618–29. doi: 10.1124/mol.115.103176 (PMC4885504; doi:10.1124/mol.115.103176), 2016-06
Supplement: supp_mol.115.103176_Corrected_Supplemental_103176.pdf [file supp_mol.115.103176_Corrected_Supplemental_103176.pdf]

Supplemental data

Mechanisms of biased beta-arrestin mediated signaling  
downstream from the cannabinoid 1 receptor (CB1R)

**Authors:** Francheska Delgado-Peraza, Kwang H. Ahn, Carlos Nogueras-Ortiz, Imran N. Mungrue, Ken Mackie, Debra A. Kendall, Guillermo A. Yudowski.

Molecular Pharmacology

**Supplementary material****Figure 1. Receptor expression levels**

(A) HEK293 cells expressing either SEP-CB1R or SEP-CB1R S426/430A were imaged live-cell confocal microscopy in the presence of 0.01% triton X-100 (S4A). Fluorescence from SEP molecules is restricted to neutral compartment. Triton X-100 was added to the imaging media before confocal imaging to neutralize any intracellular compartments (acidic) and reveal all intracellular receptor pools. (B) live HEK293 cells expressing either SEP-CB1R or SEP-CB1R S426/430A were harvested in PBS and surface fluorescence was analyzed using an imaged based cytometer. Cell count versus fluorescence was plotted and analyzed. No significant difference was observed between groups (insert) (n=2057 cells were analyzed expressing wild-type receptors and n=3547 were analyzed expressing the mutant receptor). (C) HEK cells transfected with either SEP-CB1R or SEP-CB1R S426A/S430A in the same conditions as those utilized in the manuscript, were lysed in RIPA buffer and total receptor expression levels was analyzed by western blots utilizing antibodies against GFP/SEP.

**Figure 2. beta-arrestin 1 and 2 expression knock-out by siRNAs.**

Representative western blot depicts isoform-specific knockdown of endogenous beta-arrestin 1 and 2 expression by siRNAs from HEK293 cells. Immunodetectable levels of GAPDH are shown as loading controls.

**Figure 3. Kinome antibody array analysis of CB1R activation.**

Dot blots evaluated by profiling phosphorylation of 43 human kinases. Lysates from untreated and agonist-treated (1  $\mu$ M WIN or 10  $\mu$ M 2-AG for 5 and 15 min) cells expressing the wild-type or S426A/S430A receptor were applied to a nitrocellulose membrane spotted with antibodies for 43 kinases along with control antibodies. Data are expressed as the fold change over basal level for each compound. The effect of beta-arrestin 1 knockdown (red) and PTX treatments are included.

**Figure 4. Receptor internalization kinetics and beta-arrestin recruitment**

(A) Receptor endocytosis was analyzed in HEK293 cells expressing either SEP-CB1R or SEP-CB1R S426/430A three days after transfection by TIRFM. 1 $\mu$ M WIN 55,212-2 was added and remained in the incubation media as indicated by the bar. Total surface fluorescence was analyzed in stable areas of the plasma membrane (n=7 and 10 for CB1R and CB1RS426/430A respectively, error bars represent SEM). (B) Beta-arrestin 1 recruitment was analyzed in HEK293 cells expressing beta-arrestin1-RFP with either SEP-CB1R or SEP-CB1R S426/430A. The addition of 1 $\mu$ M WIN 55,212-2 to the imaging media induced an increase in total average fluorescence proportional to the recruitment of beta-arrestin 1 (n=12 cells, 4 different experiments, errors represent SEM). (C) Beta-arrestin 2 recruitment was analyzed in HEK293 cells expressing beta-arrestin2-RFP with either SEP-CB1R or SEP-CB1R S426/430A. The addition of 1 $\mu$ M WIN 55,212-2 to the imaging media induced an increase in total average fluorescence proportional to the recruitment of beta-arrestin 2 (n=17 cells, 5 different experiments, errors represent SEM).

**Figure 5. mRNA transcripts controlled by WIN in the mutant receptor versus wild type receptor**

HEK293 cells expressing the HA-tagged rat wild-type or S426/430A mutant receptors were treated with 1  $\mu$ M WIN for 2 hrs. Differential expression was examined using DESeq2 (Bioconductor) at a 5% false discovery rate.

**Figure 6. mRNA transcripts exclusively controlled by WIN in the mutant versus untreated mutant receptor**

HEK293 cells expressing the HA-tagged rat wild-type or S426/430A mutant receptors were treated with 1  $\mu$ M WIN for 2 hrs. Transcripts specifically regulated by WIN in the mutant receptor versus the wild-type receptor are depicted.

**A**

CB1R WT

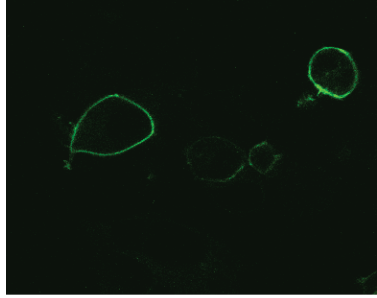

CB1R S426/430A

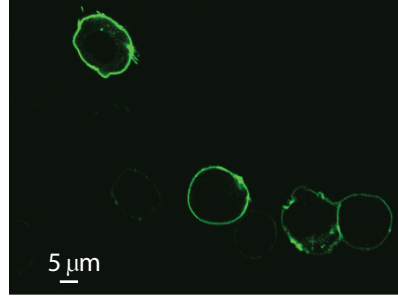**B**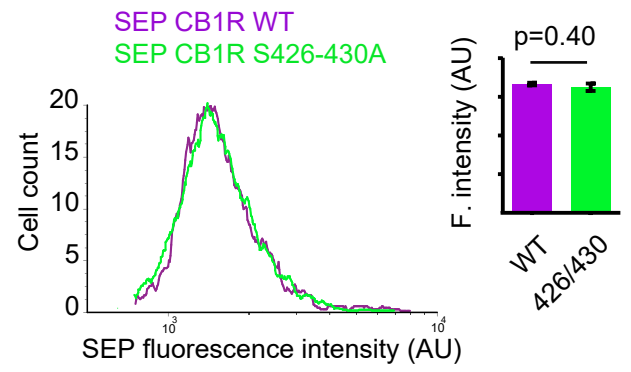**C**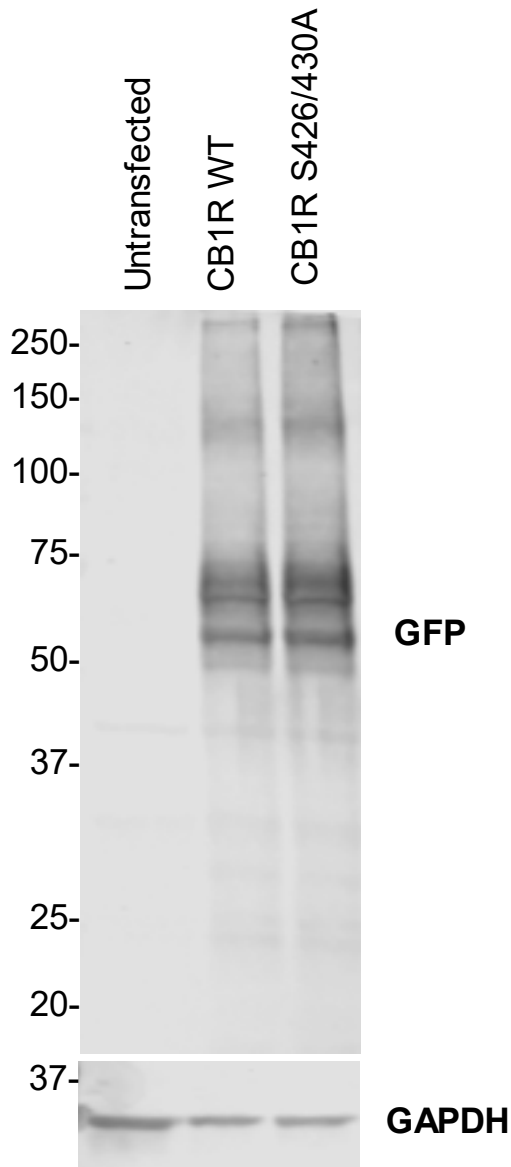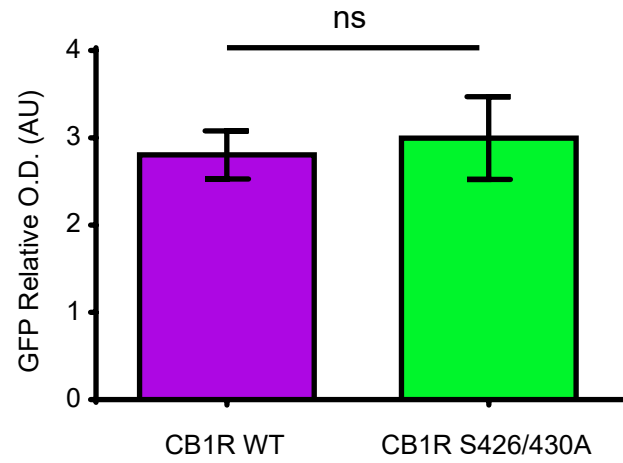

siRNA knock down

Control  $\beta$ -arr1  $\beta$ -arr2

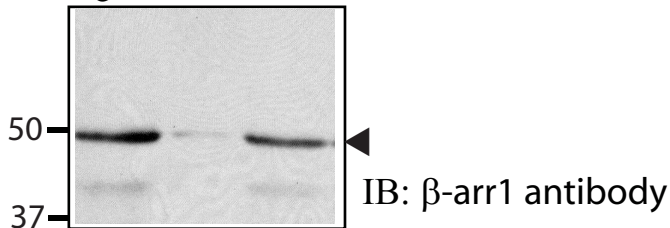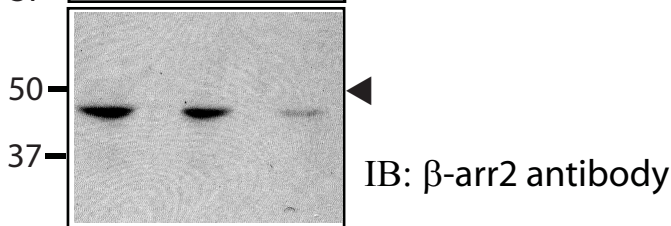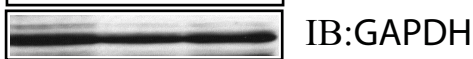

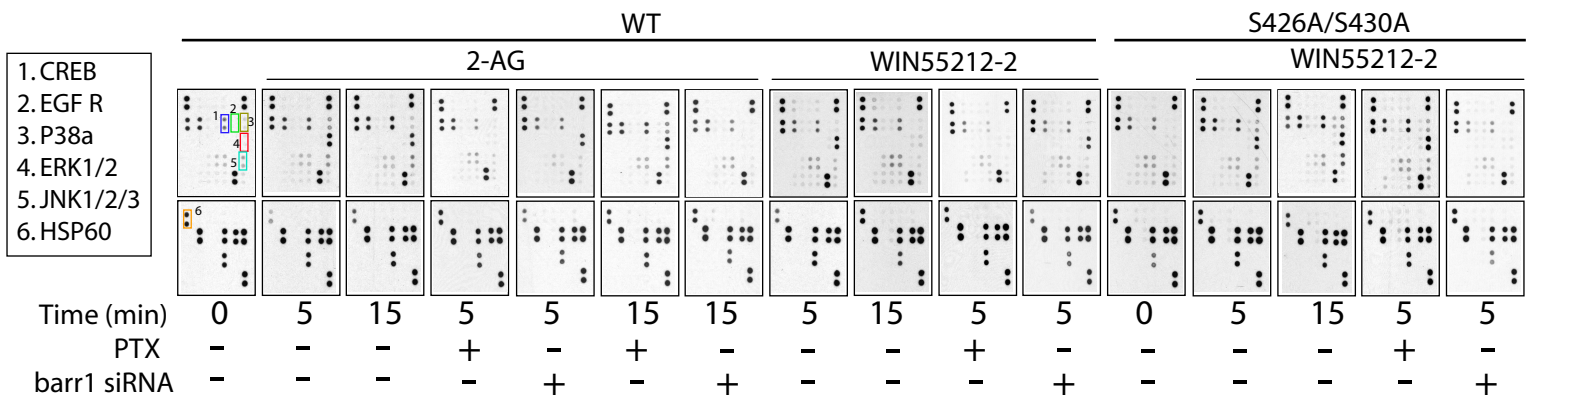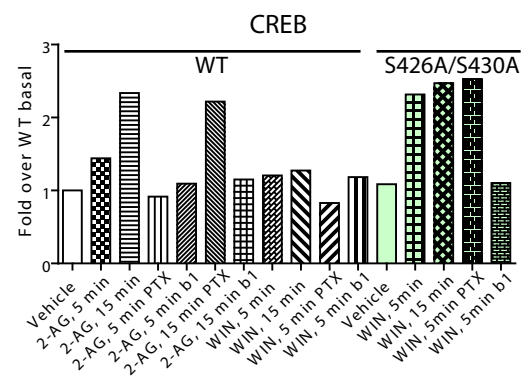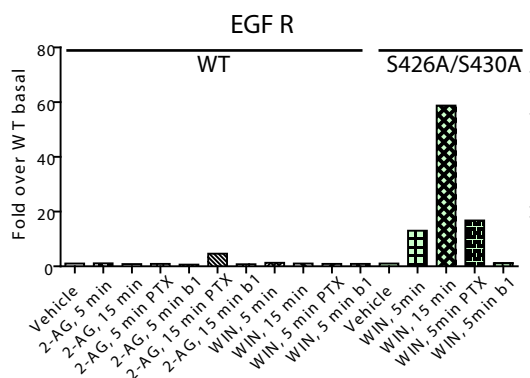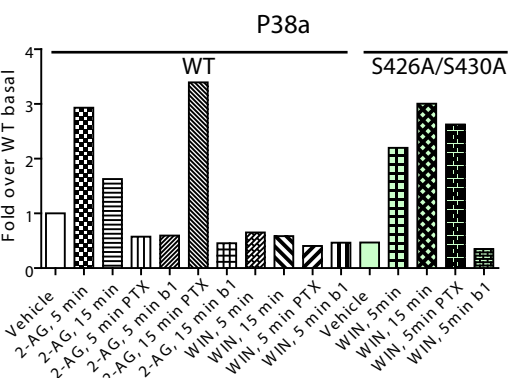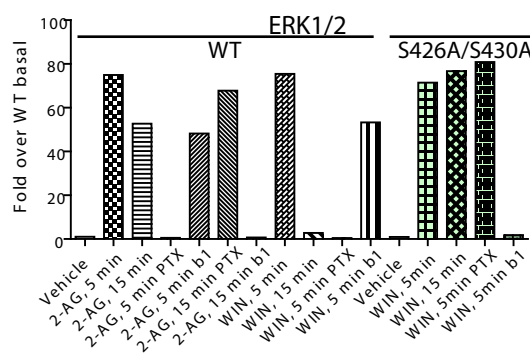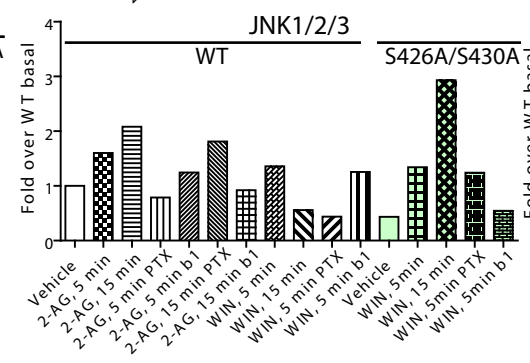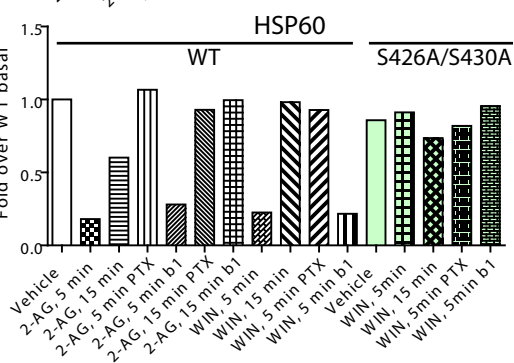

**A**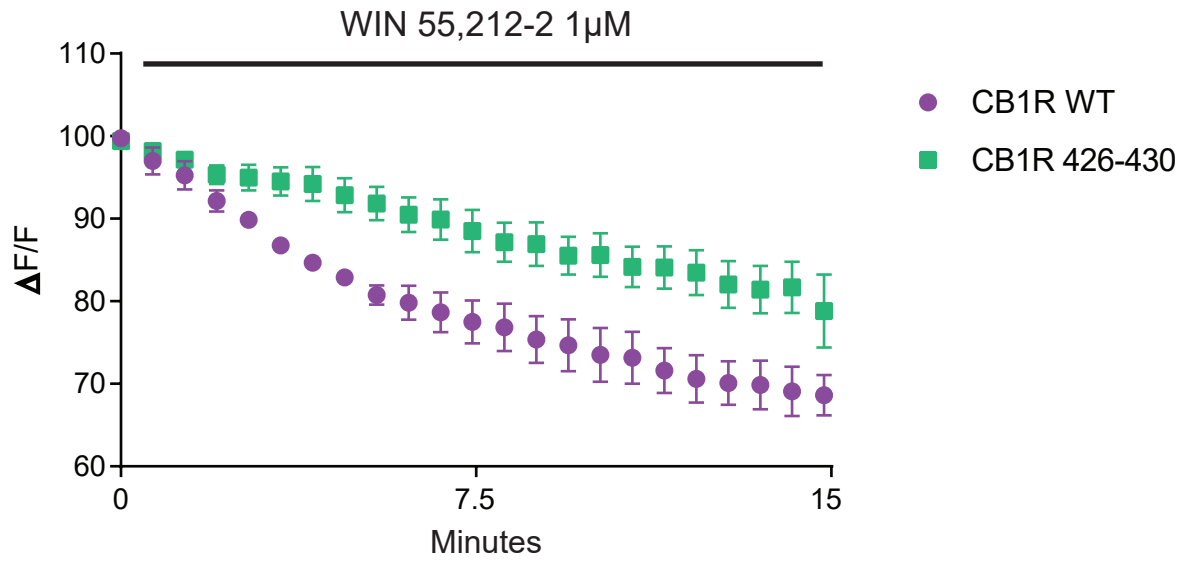**B**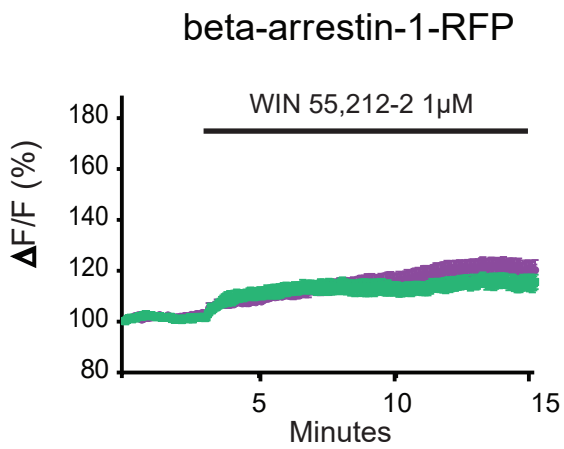**C**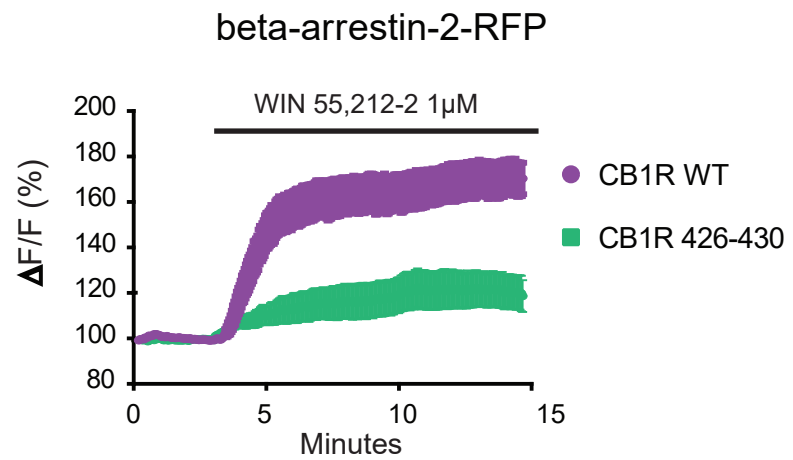

# Supplemental Figure 5

| log2FoldChange | gene_name   | gene_id            |
|----------------|-------------|--------------------|
| 0.756194486    | HIST1H2BD   | ENSG00000158373.8  |
| 0.704708337    | HIST1H2AC   | ENSG00000180573.9  |
| 0.544976822    | HIST1H1C    | ENSG00000187837.3  |
| 0.496616124    | IRF2BPL     | ENSG00000119669.4  |
| 0.481215381    | IGFBP5      | ENSG00000115461.4  |
| 0.428177503    | EGR1        | ENSG00000120738.7  |
| 0.375013166    | CYB5D2      | ENSG00000167740.7  |
| 0.358997836    | SPRYD4      | ENSG00000176422.11 |
| 0.329040231    | MEF2C       | ENSG00000081189.11 |
| 0.327534522    | MFSD11      | ENSG00000092931.9  |
| 0.31695456     | H1FO        | ENSG00000189060.5  |
| 0.305891445    | HEY2        | ENSG00000135547.6  |
| 0.295409906    | TP53INP1    | ENSG00000164938.11 |
| 0.281853184    | AMOT        | ENSG00000126016.11 |
| 0.27793488     | FOXRED2     | ENSG00000100350.12 |
| 0.261206643    | RP6-24A23.7 | ENSG00000261409.1  |
| 0.256378307    | PIK3R1      | ENSG00000145675.12 |
| 0.241896972    | CARHSP1     | ENSG00000153048.8  |
| 0.235379475    | ARPIN       | ENSG00000242498.5  |
| 0.232670287    | PIK3R3      | ENSG00000117461.12 |
| 0.223488559    | ZNF780A     | ENSG00000197782.12 |
| 0.206201696    | SESN3       | ENSG00000149212.8  |
| 0.206193493    | VCAN        | ENSG00000038427.13 |
| 0.197579725    | SKAP2       | ENSG00000005020.10 |
| 0.196089659    | SLIT2       | ENSG00000145147.17 |
| 0.19421888     | EIF4EBP2    | ENSG00000148730.6  |
| 0.19371428     | CBX5        | ENSG00000094916.11 |
| 0.1916536      | SPEN        | ENSG00000065526.8  |
| 0.190804685    | SFT2D2      | ENSG00000213064.7  |
| 0.190731559    | KLF6        | ENSG00000067082.12 |
| 0.189841518    | FAM208A     | ENSG00000163946.11 |
| 0.188633178    | MDM2        | ENSG00000135679.19 |
| 0.186157629    | DCP2        | ENSG00000172795.13 |
| 0.17710899     | IRS4        | ENSG00000133124.11 |
| 0.175036409    | SOX4        | ENSG00000124766.5  |
| 0.171127186    | LAMA4       | ENSG00000112769.16 |
| 0.1686248      | MTR         | ENSG00000116984.10 |
| 0.167291968    | PIP4K2B     | ENSG00000276293.2  |
| 0.162184632    | CDK1        | ENSG00000170312.13 |
| 0.154901621    | DDX17       | ENSG00000100201.16 |
| 0.153536238    | ZNF121      | ENSG00000197961.9  |
| 0.148271893    | TOP2A       | ENSG00000131747.12 |
| 0.143674123    | USP22       | ENSG00000124422.9  |
| 0.138877199    | MCM6        | ENSG00000076003.4  |
| 0.128724127    | CAND1       | ENSG00000111530.10 |
| 0.128476729    | DCAF7       | ENSG00000136485.12 |
| 0.128362605    | PEG10       | ENSG00000242265.3  |
| 0.125922463    | TUBB        | ENSG00000196230.10 |
| 0.114728042    | PERP        | ENSG00000112378.11 |
| 0.113499208    | CSE1L       | ENSG00000124207.14 |
| 0.112692195    | NCAPD2      | ENSG0000010292.10  |
| 0.112639861    | NUCKS1      | ENSG00000069275.12 |
| 0.107116277    | HUWE1       | ENSG00000086758.13 |
| 0.098140679    | MKI67       | ENSG00000148773.10 |
| 0.092455396    | MT-ND5      | ENSG00000198786.2  |
| 0.077177724    | PKM         | ENSG00000067225.15 |
| -0.072967786   | RPS4X       | ENSG00000198034.8  |
| -0.084407491   | HSP90AA1    | ENSG00000080824.16 |
| -0.084991614   | GNB2L1      | ENSG00000204628.9  |
| -0.092470499   | NACA        | ENSG00000196531.8  |
| -0.093323929   | RPL27       | ENSG00000131469.10 |
| -0.101584867   | MT-CO1      | ENSG00000198804.2  |
| -0.102105396   | RPS8        | ENSG00000142937.9  |
| -0.103178102   | NOP56       | ENSG00000101361.12 |



|                      |                    |
|----------------------|--------------------|
| -0.108690682 DDX21   | ENSG00000165732.10 |
| -0.109439689 ATP2A2  | ENSG00000174437.14 |
| -0.111048204 EIF3K   | ENSG00000178982.7  |
| -0.112213983 RPL32   | ENSG00000144713.10 |
| -0.114099871 NCL     | ENSG00000115053.13 |
| -0.114303238 RPL30   | ENSG00000156482.8  |
| -0.115008717 EIF5    | ENSG00000100664.8  |
| -0.115680567 PMAIP1  | ENSG00000141682.11 |
| -0.115733588 RPS18   | ENSG00000231500.4  |
| -0.116091951 UBB     | ENSG00000170315.11 |
| -0.119032833 RPL8    | ENSG00000161016.13 |
| -0.119054402 VCL     | ENSG00000035403.14 |
| -0.121583447 MARS    | ENSG00000166986.10 |
| -0.121989827 RPL18   | ENSG00000063177.10 |
| -0.129562512 RPL13   | ENSG00000167526.11 |
| -0.129707247 RPS17   | ENSG00000182774.8  |
| -0.13078334 RPS12    | ENSG00000112306.7  |
| -0.132198398 RPL26   | ENSG00000161970.10 |
| -0.132417325 RPL19   | ENSG00000108298.7  |
| -0.132946757 EIF4A2  | ENSG00000156976.12 |
| -0.133126355 TXNRD1  | ENSG00000198431.13 |
| -0.134008434 HSPA9   | ENSG00000113013.10 |
| -0.134812014 RBM39   | ENSG00000131051.18 |
| -0.136555495 CLPTM1L | ENSG00000049656.11 |
| -0.136861818 MAP1B   | ENSG00000131711.12 |
| -0.137108735 MTDH    | ENSG00000147649.7  |
| -0.137231406 SRP72   | ENSG00000174780.13 |
| -0.137703738 OS9     | ENSG00000135506.13 |
| -0.139060883 TARS    | ENSG00000113407.11 |
| -0.139492932 DDOST   | ENSG00000244038.7  |
| -0.139952138 RPL13A  | ENSG00000142541.14 |
| -0.139968495 ASNS    | ENSG00000070669.14 |
| -0.143253062 RPL37   | ENSG00000145592.11 |
| -0.144647277 SHMT2   | ENSG00000182199.8  |
| -0.149594701 RPL35   | ENSG00000136942.12 |
| -0.149878422 CDV3    | ENSG00000091527.13 |
| -0.151167101 RCN1    | ENSG00000049449.6  |
| -0.151631036 ANXA5   | ENSG00000164111.12 |
| -0.151760563 RPN2    | ENSG00000118705.14 |
| -0.154291334 TAF7    | ENSG00000178913.7  |
| -0.154386776 KDEL2   | ENSG00000136240.7  |
| -0.155058724 RPS24   | ENSG00000138326.16 |
| -0.155173325 SRPR    | ENSG00000182934.9  |
| -0.156334617 FKBP1A  | ENSG00000088832.12 |
| -0.158314449 GOLGB1  | ENSG00000173230.13 |
| -0.158642484 AUP1    | ENSG00000115307.14 |
| -0.15926162 EIF2S2   | ENSG00000125977.6  |
| -0.159515985 SRP68   | ENSG00000167881.12 |
| -0.159712262 UBE2J1  | ENSG00000198833.6  |
| -0.159934983 ACBD3   | ENSG00000182827.8  |
| -0.161404853 OSBP    | ENSG00000110048.9  |
| -0.163427573 SBDS    | ENSG00000126524.7  |
| -0.163571497 HSPH1   | ENSG00000120694.17 |
| -0.164297615 RND3    | ENSG00000115963.11 |
| -0.164470821 RPL28   | ENSG00000108107.10 |
| -0.166222834 XPOT    | ENSG00000184575.9  |
| -0.169484816 SARS    | ENSG00000031698.10 |
| -0.170240932 SLC38A2 | ENSG00000134294.11 |
| -0.170457825 GARS    | ENSG00000106105.11 |
| -0.17180348 MIA3     | ENSG00000154305.14 |
| -0.172296841 DDX3X   | ENSG00000215301.7  |
| -0.172307195 SARAF   | ENSG00000133872.11 |
| -0.173169169 MCFD2   | ENSG00000180398.9  |
| -0.173996581 AHSA1   | ENSG00000100591.5  |
| -0.17429897 COPB2    | ENSG00000184432.7  |

|                       |                    |
|-----------------------|--------------------|
| -0.174445774 SLC38A1  | ENSG00000111371.13 |
| -0.174975906 USP36    | ENSG00000055483.17 |
| -0.176150277 C6orf48  | ENSG00000204387.10 |
| -0.177516161 KRT18    | ENSG00000111057.8  |
| -0.178671702 IDI1     | ENSG00000067064.8  |
| -0.178865938 PSMC4    | ENSG00000013275.5  |
| -0.179390195 FTH1     | ENSG00000167996.13 |
| -0.180200161 SLC7A1   | ENSG00000139514.10 |
| -0.182606774 GNL3     | ENSG00000163938.14 |
| -0.183984836 TMEM214  | ENSG00000119777.16 |
| -0.184176225 RPS2     | ENSG00000140988.13 |
| -0.187201677 PVR      | ENSG00000073008.12 |
| -0.187299812 COPA     | ENSG00000122218.12 |
| -0.187361522 CKAP4    | ENSG00000136026.11 |
| -0.187745238 RPL12    | ENSG00000197958.10 |
| -0.188048615 MTHFD2   | ENSG00000065911.9  |
| -0.188080389 IGF1R    | ENSG00000140443.11 |
| -0.189588805 TPM4     | ENSG00000167460.12 |
| -0.190629313 COPB1    | ENSG00000129083.10 |
| -0.191302591 TTC17    | ENSG00000052841.12 |
| -0.191397977 VMP1     | ENSG00000062716.8  |
| -0.192527011 MORF4L2  | ENSG00000123562.14 |
| -0.193727567 ACTB     | ENSG00000075624.11 |
| -0.194930758 C16orf58 | ENSG00000140688.14 |
| -0.195688863 SAP18    | ENSG00000150459.10 |
| -0.196447666 TRIM11   | ENSG00000154370.11 |
| -0.196591053 UFD1L    | ENSG00000070010.16 |
| -0.196603234 GORASP2  | ENSG00000115806.10 |
| -0.196674725 DNAJA1   | ENSG00000086061.13 |
| -0.196896995 TPT1     | ENSG00000133112.14 |
| -0.196924133 FOSL2    | ENSG00000075426.9  |
| -0.197090532 FAM46A   | ENSG00000112773.13 |
| -0.19756713 UBE2O     | ENSG00000175931.10 |
| -0.198045879 CEBPG    | ENSG00000153879.6  |
| -0.200182859 HDLBP    | ENSG00000115677.14 |
| -0.200643814 VEGFA    | ENSG00000112715.18 |
| -0.201560551 ANXA1    | ENSG00000135046.11 |
| -0.201974988 SLC39A7  | ENSG00000112473.14 |
| -0.203171141 TIMM17A  | ENSG00000134375.8  |
| -0.203645305 SRPRB    | ENSG00000144867.9  |
| -0.204525296 UBXN1    | ENSG00000162191.11 |
| -0.205596225 RPS6     | ENSG00000137154.10 |
| -0.207582335 ARF1     | ENSG00000143761.11 |
| -0.210140723 PREB     | ENSG00000138073.11 |
| -0.210483751 LMAN1    | ENSG00000074695.5  |
| -0.210970096 BTG2     | ENSG00000159388.5  |
| -0.213722214 UAP1     | ENSG00000117143.11 |
| -0.213957165 SLC7A11  | ENSG00000151012.11 |
| -0.215576068 TMED10   | ENSG00000170348.6  |
| -0.216373736 LRRCS9   | ENSG00000108829.9  |
| -0.217258352 CSRP1    | ENSG00000159176.11 |
| -0.219615325 DNAJC10  | ENSG00000077232.14 |
| -0.219668819 ZNF331   | ENSG00000130844.14 |
| -0.221097735 SURF4    | ENSG00000148248.11 |
| -0.223775187 RPL18A   | ENSG00000105640.10 |
| -0.224091797 SERPINH1 | ENSG00000149257.11 |
| -0.228354961 ZBTB21   | ENSG00000173276.11 |
| -0.229305634 SF3B5    | ENSG00000169976.6  |
| -0.22970786 RPN1      | ENSG00000163902.9  |
| -0.229965077 CALU     | ENSG00000128595.14 |
| -0.233095578 TPM1     | ENSG00000140416.17 |
| -0.233208814 KIF1A    | ENSG00000130294.12 |
| -0.234898186 EIF2AK3  | ENSG00000172071.9  |
| -0.234961365 STT3A    | ENSG00000134910.10 |
| -0.235301244 MAGT1    | ENSG00000102158.17 |

|                        |                    |
|------------------------|--------------------|
| -0.235980797 ZYX       | ENSG00000159840.13 |
| -0.236554 CALR         | ENSG00000179218.11 |
| -0.237046509 FTL       | ENSG00000087086.11 |
| -0.238664882 SYVN1     | ENSG00000162298.14 |
| -0.241189645 ERP44     | ENSG00000023318.7  |
| -0.241223833 CD55      | ENSG00000196352.11 |
| -0.241496808 TMED2     | ENSG00000086598.8  |
| -0.242020843 NDRG1     | ENSG00000104419.12 |
| -0.243083224 CDC6      | ENSG00000094804.7  |
| -0.243394897 DNAH17    | ENSG00000187775.14 |
| -0.244347154 IFRD1     | ENSG00000006652.11 |
| -0.244848991 SLC39A14  | ENSG00000104635.11 |
| -0.245353394 TMED5     | ENSG00000117500.10 |
| -0.246173132 TSC22D3   | ENSG00000157514.14 |
| -0.248249095 SEC63     | ENSG00000025796.11 |
| -0.248475527 STC2      | ENSG00000113739.8  |
| -0.250109456 TFRC      | ENSG00000072274.10 |
| -0.2509605 CREB3L2     | ENSG00000182158.12 |
| -0.250999195 SEC23B    | ENSG00000101310.12 |
| -0.251940583 CITED2    | ENSG00000164442.9  |
| -0.252682146 DUSP1     | ENSG00000120129.5  |
| -0.252705883 JMJ6      | ENSG00000070495.12 |
| -0.252875053 SSR1      | ENSG00000124783.10 |
| -0.253494186 GABARAPL1 | ENSG00000139112.8  |
| -0.253590457 COL12A1   | ENSG00000111799.18 |
| -0.26009318 ERLEC1     | ENSG00000068912.11 |
| -0.260611449 DUSP14    | ENSG00000276023.2  |
| -0.260892692 GLA       | ENSG00000102393.7  |
| -0.261416085 PPP1R15A  | ENSG00000087074.7  |
| -0.26273262 CCDC59     | ENSG00000133773.9  |
| -0.265286488 BAG3      | ENSG00000151929.7  |
| -0.265597302 RRB1      | ENSG00000125844.13 |
| -0.266110779 TSPYL2    | ENSG00000184205.12 |
| -0.267287431 UFM1      | ENSG00000120686.9  |
| -0.267343982 COPG1     | ENSG00000181789.12 |
| -0.268944646 INSIG1    | ENSG00000186480.10 |
| -0.274111537 SEC13     | ENSG00000157020.15 |
| -0.275174518 TMED9     | ENSG00000184840.9  |
| -0.278942085 ZDBF2     | ENSG00000204186.5  |
| -0.281799934 HSPA13    | ENSG00000155304.5  |
| -0.284221298 KIF5C     | ENSG00000168280.14 |
| -0.284281589 SPCS2     | ENSG00000118363.9  |
| -0.28995099 GFPT1      | ENSG00000198380.10 |
| -0.290922775 SEC61A1   | ENSG00000058262.7  |
| -0.290991671 ADAMTS1   | ENSG00000154734.12 |
| -0.291011084 CREM      | ENSG00000095794.17 |
| -0.292515568 NFIL3     | ENSG00000165030.3  |
| -0.297362383 RHOQ      | ENSG00000119729.8  |
| -0.29812368 PDIA6      | ENSG00000143870.10 |
| -0.298806272 ZNF229    | ENSG00000278318.2  |
| -0.29958275 CANX       | ENSG00000127022.12 |
| -0.300552779 TRAM1     | ENSG00000067167.5  |
| -0.301210752 SND1      | ENSG00000197157.8  |
| -0.302751042 HEXIM1    | ENSG00000186834.3  |
| -0.30585103 WARS       | ENSG00000140105.15 |
| -0.311193909 SYAP1     | ENSG00000169895.5  |
| -0.312351909 SLC7A5    | ENSG00000103257.6  |
| -0.312506838 ARF4      | ENSG00000168374.8  |
| -0.314592586 HM13      | ENSG00000101294.14 |
| -0.314756024 PDIA3     | ENSG00000167004.10 |
| -0.317259116 EPHA2     | ENSG00000142627.11 |
| -0.320279318 UBC       | ENSG00000150991.12 |
| -0.323078522 SLFN11    | ENSG00000172716.14 |
| -0.325785876 HK2       | ENSG00000159399.7  |
| -0.326419515 PHLDB2    | ENSG00000144824.17 |

|              |          |                    |
|--------------|----------|--------------------|
| -0.330693869 | CHMP1B   | ENSG00000255112.2  |
| -0.334477121 | PGM3     | ENSG00000013375.13 |
| -0.335781987 | XBP1     | ENSG00000100219.14 |
| -0.335979166 | SLC35B1  | ENSG00000121073.11 |
| -0.337014595 | FAM129A  | ENSG00000135842.14 |
| -0.338561754 | SEC11C   | ENSG00000166562.6  |
| -0.340403509 | P4HB     | ENSG00000185624.12 |
| -0.341707975 | CNN2     | ENSG00000064666.12 |
| -0.344280457 | ARFGAP3  | ENSG00000242247.8  |
| -0.346353629 | C19orf10 | ENSG00000074842.5  |
| -0.346422254 | SSR2     | ENSG00000163479.11 |
| -0.346487288 | GOLGA5   | ENSG00000066455.10 |
| -0.348570161 | PTP4A1   | ENSG00000112245.7  |
| -0.34902443  | GMPPB    | ENSG00000173540.10 |
| -0.350797342 | SLC1A4   | ENSG00000115902.8  |
| -0.356424127 | TMEM39A  | ENSG00000176142.10 |
| -0.359046881 | HSPB8    | ENSG00000152137.4  |
| -0.360359278 | SEL1L    | ENSG00000071537.11 |
| -0.361714337 | ITPRIP   | ENSG00000148841.13 |
| -0.361974844 | OSTC     | ENSG00000198856.10 |
| -0.362706649 | HSPA8    | ENSG00000109971.11 |
| -0.365919808 | NUCB2    | ENSG00000070081.13 |
| -0.36595     | DNAJC3   | ENSG00000102580.12 |
| -0.371779481 | ERO1LB   | ENSG00000086619.11 |
| -0.384984283 | PTGS2    | ENSG00000073756.9  |
| -0.391000798 | DNAJB1   | ENSG00000132002.5  |
| -0.391330944 | SSR4     | ENSG00000180879.11 |
| -0.395350403 | VIMP     | ENSG00000131871.12 |
| -0.39656917  | ANKRD1   | ENSG00000148677.6  |
| -0.39735974  | GMPPA    | ENSG00000144591.15 |
| -0.400791201 | PMEPA1   | ENSG00000124225.13 |
| -0.406232375 | MAFK     | ENSG00000198517.7  |
| -0.435433076 | NEDD9    | ENSG00000111859.14 |
| -0.440001553 | PPIB     | ENSG00000166794.4  |
| -0.448176554 | SERP1    | ENSG00000120742.8  |
| -0.450211621 | SSR3     | ENSG00000114850.4  |
| -0.452550826 | MBNL2    | ENSG00000139793.16 |
| -0.455320795 | NANS     | ENSG00000095380.10 |
| -0.457716612 | TRIM5    | ENSG00000132256.16 |
| -0.478469369 | FOSB     | ENSG00000125740.11 |
| -0.479545955 | EIF4A1   | ENSG00000161960.12 |
| -0.482983957 | HSP90B1  | ENSG00000166598.10 |
| -0.48576515  | PDIA5    | ENSG00000065485.15 |
| -0.489120583 | ELL2     | ENSG00000118985.12 |
| -0.517195973 | MANF     | ENSG00000145050.13 |
| -0.518875854 | HSPA1B   | ENSG00000204388.6  |
| -0.522001206 | FKBP2    | ENSG00000173486.10 |
| -0.528596848 | DNAJB11  | ENSG00000090520.8  |
| -0.539390751 | SLC2A3   | ENSG00000059804.13 |
| -0.540893845 | FICD     | ENSG00000198855.4  |
| -0.568562201 | CHAC1    | ENSG00000128965.9  |
| -0.581409315 | SELK     | ENSG00000113811.8  |
| -0.582739686 | TRIB3    | ENSG00000101255.8  |
| -0.588586026 | CDK2AP2  | ENSG00000167797.5  |
| -0.6028449   | HYOU1    | ENSG00000149428.16 |
| -0.602964399 | PDIA4    | ENSG00000155660.8  |
| -0.606225909 | HSPA1A   | ENSG00000204389.9  |
| -0.62371381  | PPAPDC1B | ENSG00000147535.14 |
| -0.62853397  | WIPI1    | ENSG00000070540.10 |
| -0.64184692  | GLIPR1   | ENSG00000139278.7  |
| -0.649215685 | DERL3    | ENSG00000099958.12 |
| -0.651474292 | HERPUD1  | ENSG00000051108.12 |
| -0.651964524 | HSPA5    | ENSG00000044574.7  |
| -0.679393234 | HID1     | ENSG00000167861.13 |
| -0.690259591 | DNAJB9   | ENSG00000128590.4  |

|                     |                    |
|---------------------|--------------------|
| -0.70882547 CRELD2  | ENSG00000184164.12 |
| -0.733025061 SDF2L1 | ENSG00000128228.4  |
| -0.784240922 SEC24D | ENSG00000150961.12 |
| -0.845014629 ACTBL2 | ENSG00000169067.3  |
| -0.889839799 CYR61  | ENSG00000142871.13 |
| -0.983024239 KRT17  | ENSG00000128422.13 |
| -1.156678504 TAC1   | ENSG00000006128.9  |
| -1.212235778 NR4A3  | ENSG00000119508.15 |
| -1.244382511 NR4A2  | ENSG00000153234.11 |
| -1.2919287 CTGF     | ENSG00000118523.5  |
| -1.71379434 NR4A1   | ENSG00000123358.17 |
| -3.30547802 GH1     | ENSG00000259384.4  |

## Supplemental figure 6

Exclusive transcripts controlled by beta-arrestins

| ENSEMBL Gene       | Abbr name | log2fold change | Fold change |
|--------------------|-----------|-----------------|-------------|
| ENSG00000128965.9  | CHAC1     | -0.57           | 0.67        |
| ENSG00000173486.10 | FKBP2     | -0.52           | 0.70        |
| ENSG00000161960.12 | EIF4A1    | -0.48           | 0.72        |
| ENSG00000149257.11 | SERPINH1  | -0.45           | 0.73        |
| ENSG00000124225.13 | PMEPA1    | -0.4            | 0.76        |
| ENSG00000180879.11 | SSR4      | -0.39           | 0.76        |
| ENSG00000276023.2  | DUSP14    | -0.29           | 0.82        |
| ENSG00000168280.14 | KIF5C     | -0.28           | 0.82        |
| ENSG00000118363.9  | SPCS2     | -0.28           | 0.82        |
| ENSG00000068912.11 | ERLEC1    | -0.26           | 0.84        |
| ENSG00000070495.12 | JMJD6     | -0.25           | 0.84        |
| ENSG00000117500.10 | TMED5     | -0.24           | 0.85        |
| ENSG00000169976.6  | SF3B5     | -0.23           | 0.85        |
| ENSG00000112715.18 | VEGFA     | -0.2            | 0.87        |
| ENSG00000167996.13 | FTH1      | -0.18           | 0.88        |
| ENSG00000140988.13 | RPS2      | -0.18           | 0.88        |
| ENSG00000204387.10 | C6orf48   | -0.176          | 0.89        |
| ENSG00000180398.9  | MCFD2     | -0.17           | 0.89        |
| ENSG00000134294.11 | SLC38A2   | -0.17           | 0.89        |
| ENSG00000167881.12 | SRP68     | -0.16           | 0.90        |
| ENSG00000138326.16 | RPS24     | -0.16           | 0.90        |
| ENSG00000164111.12 | ANXA5     | -0.15           | 0.90        |
| ENSG00000182199.8  | SHMT2     | -0.145          | 0.90        |
| ENSG00000108298.7  | RPL19     | -0.13           | 0.91        |
| ENSG00000124422.9  | USP22     | 0.14            | 1.10        |
| ENSG00000116984.10 | MTR       | 0.17            | 1.13        |
| ENSG00000148730.6  | EIF4EBP2  | 0.19            | 1.14        |
| ENSG00000242498.5  | ARPIN     | 0.235           | 1.18        |
| ENSG00000153048.8  | CARHSP1   | 0.24            | 1.18        |
| ENSG00000100350.12 | FOXRED2   | 0.28            | 1.21        |
| ENSG00000135547.6  | HEY2      | 0.3             | 1.23        |
| ENSG00000092931.9  | MFSD11    | 0.33            | 1.26        |
| ENSG00000081189.11 | MEF2C     | 0.33            | 1.26        |
| ENSG00000167740.7  | CYB5D2    | 0.38            | 1.30        |
| ENSG00000119669.4  | IRF2BPL   | 0.5             | 1.41        |
